# Supplementary material for: Electrochemistry of layered metal diborides
Source: Royal Society of Chemistry journal article supplement (doi:10.1039/c8nr02142b), 2018-01-01
Supplement: c8nr02142b1.pdf [file c8nr02142b1.pdf]

## SUPPORTING INFORMATION

### Electrochemistry of layered metal diborides

V. Mazánek<sup>a</sup>, Hindia Nahdi<sup>b</sup>, J. Luxa<sup>a</sup>, Z. Sofer<sup>a</sup>, M. Pumera<sup>a,b</sup>

<sup>a</sup> University of Chemistry and Technology, Department of Inorganic Chemistry, 166 28 Prague 6, Czech Republic. E-mail: zdenek.sofer@vscht.cz, Fax: +420 22431-0422

<sup>b</sup> Division of Chemistry & Biological Chemistry, School of Physical and Mathematical Sciences, Nanyang Technological University, Nanyang Link 21, Singapore, 637371, Singapore. Fax: +65 6791-1961, E-mail: pumera@ntu.edu.sg

**Table SI1.** List of powder diffraction files used for identification of phase composition from diffractograms.

| Phase                              | PDF         | Phase                  | PDF         | Phase                  | PDF         |
|------------------------------------|-------------|------------------------|-------------|------------------------|-------------|
| <b>AlB<sub>2</sub></b>             | 04-010-4305 | <b>HfB</b>             | 04-004-7156 | <b>TiB<sub>2</sub></b> | 03-065-1073 |
| <b>Al<sub>2</sub>O<sub>3</sub></b> | 01-076-8057 | <b>MgB<sub>2</sub></b> | 04-013-1803 | <b>TiN</b>             | 03-065-0414 |
| <b>Al</b>                          | 04-003-4850 | <b>MgO</b>             | 04-012-3469 | <b>VB<sub>2</sub></b>  | 04-006-2024 |
| <b>CrB<sub>2</sub></b>             | 04-003-6119 | <b>MgB<sub>4</sub></b> | 03-065-1310 | <b>VO<sub>2</sub></b>  | 04-005-7410 |
| <b>Cr<sub>3</sub>B<sub>4</sub></b> | 04-003-0080 | <b>NbB<sub>2</sub></b> | 03-065-0512 | <b>ZrB<sub>2</sub></b> | 04-004-2991 |
| <b>HfB<sub>2</sub></b>             | 04-001-1202 | <b>TaB<sub>2</sub></b> | 01-075-0966 | <b>ZrB</b>             | 03-065-2907 |

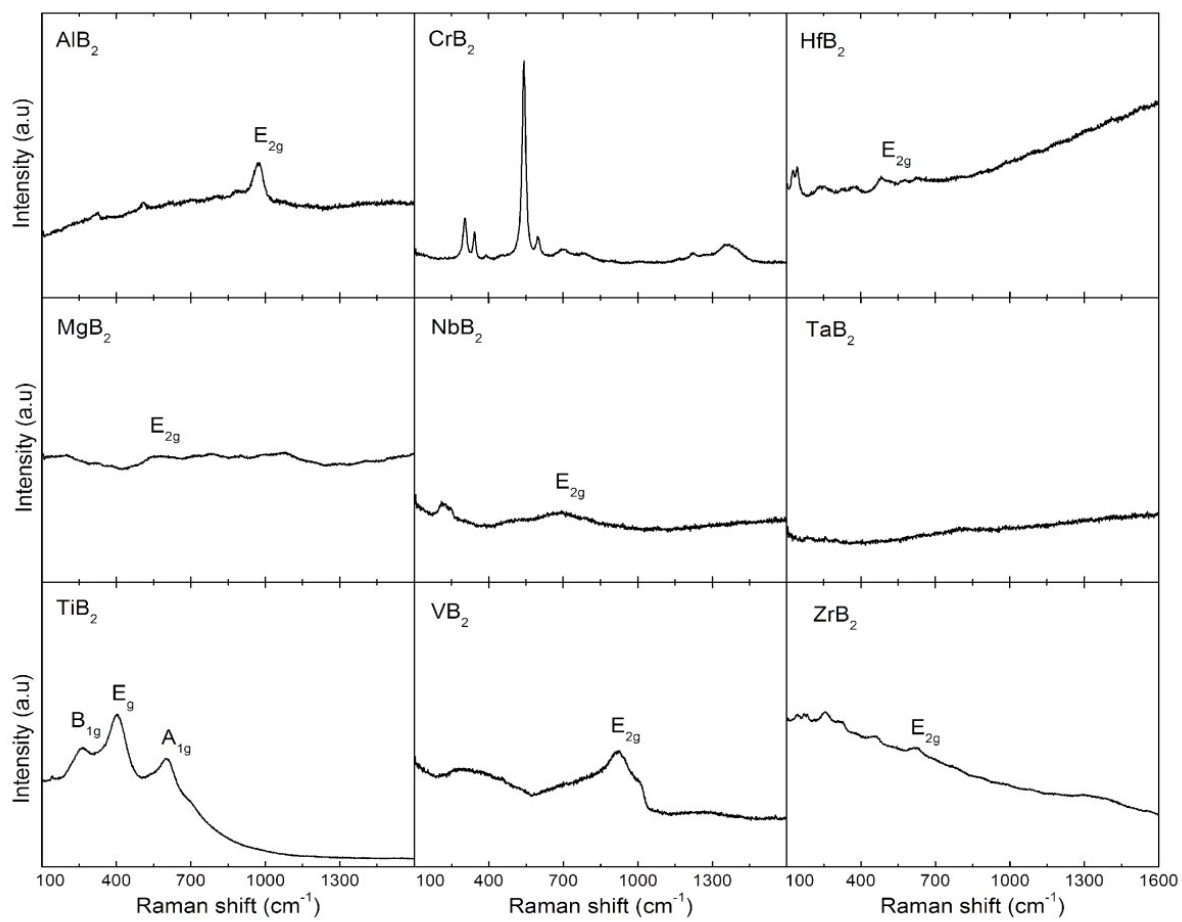

**Figure S1.** Raman spectra of layered diborides.

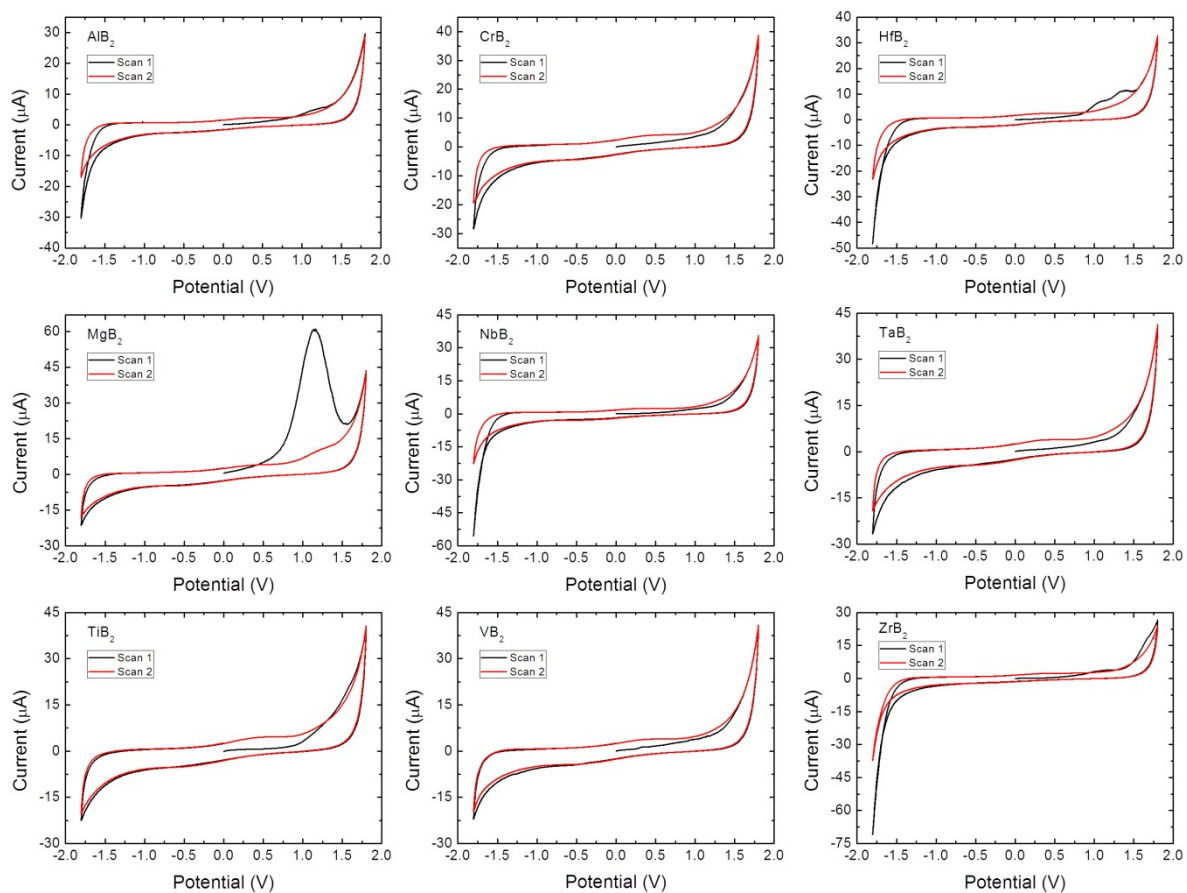

**Figure S2.** Inherent electrochemistry of layered diborides. The scan start at 0.0 V vs. sat. Ag/AgCl in anodic direction. Conditions: supporting electrolyte 50 mM PBS pH 7.2 scan rate 100 mVs<sup>-1</sup>.

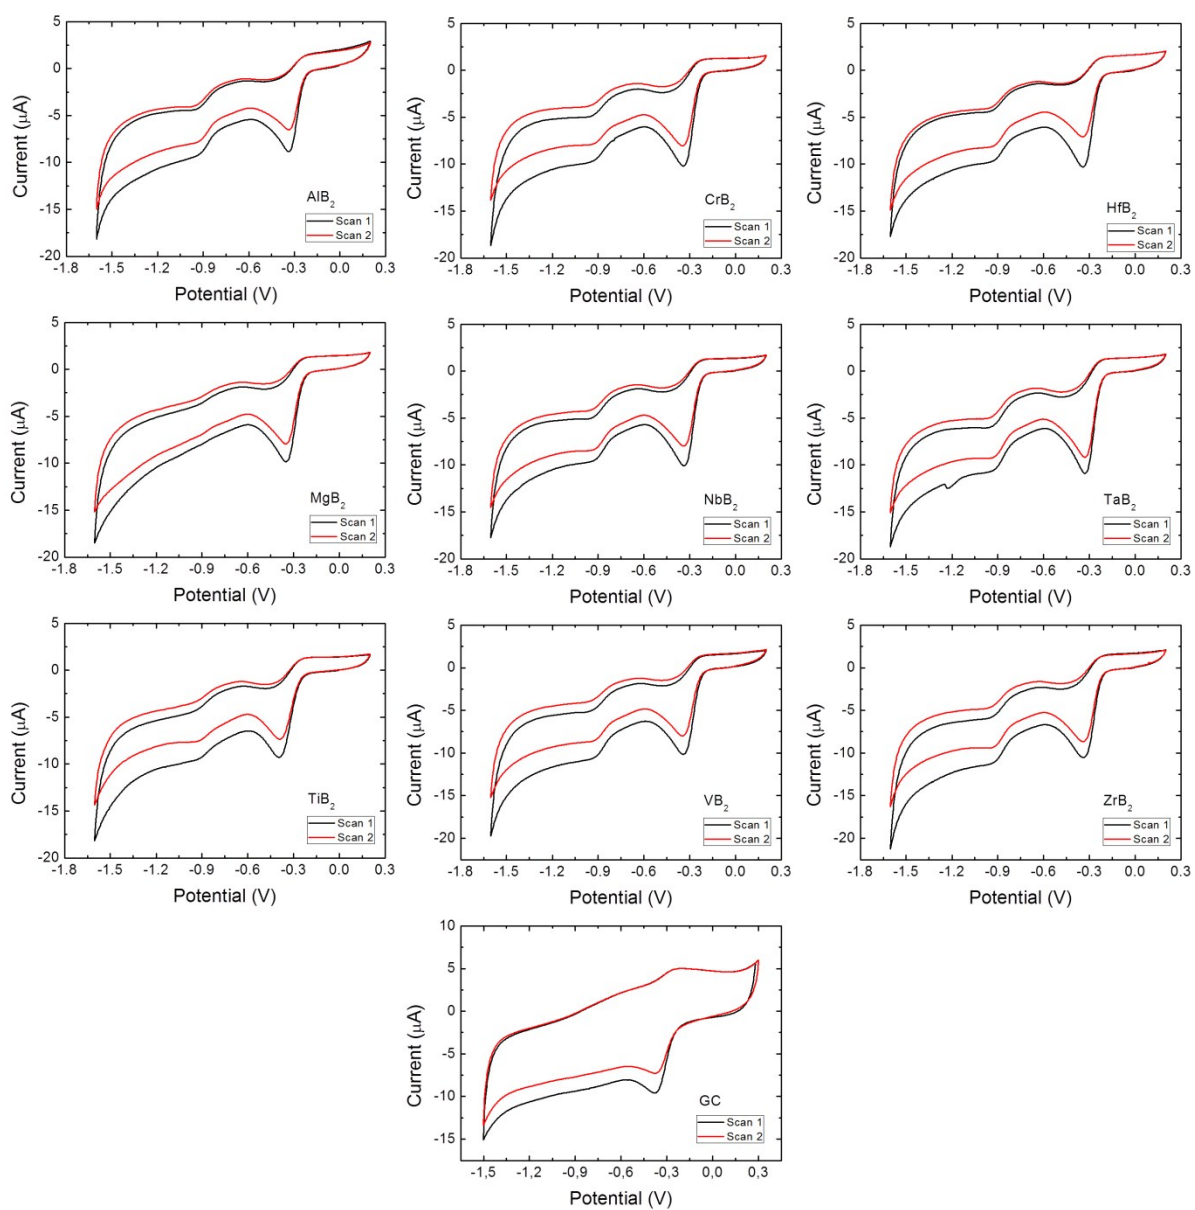

**Figure S3.** ORR measured by cyclic voltammetry on layered diborides and bare GC electrode.
